# Supplementary material
Source: PubMed Central journal article supplement (PMC1283808)

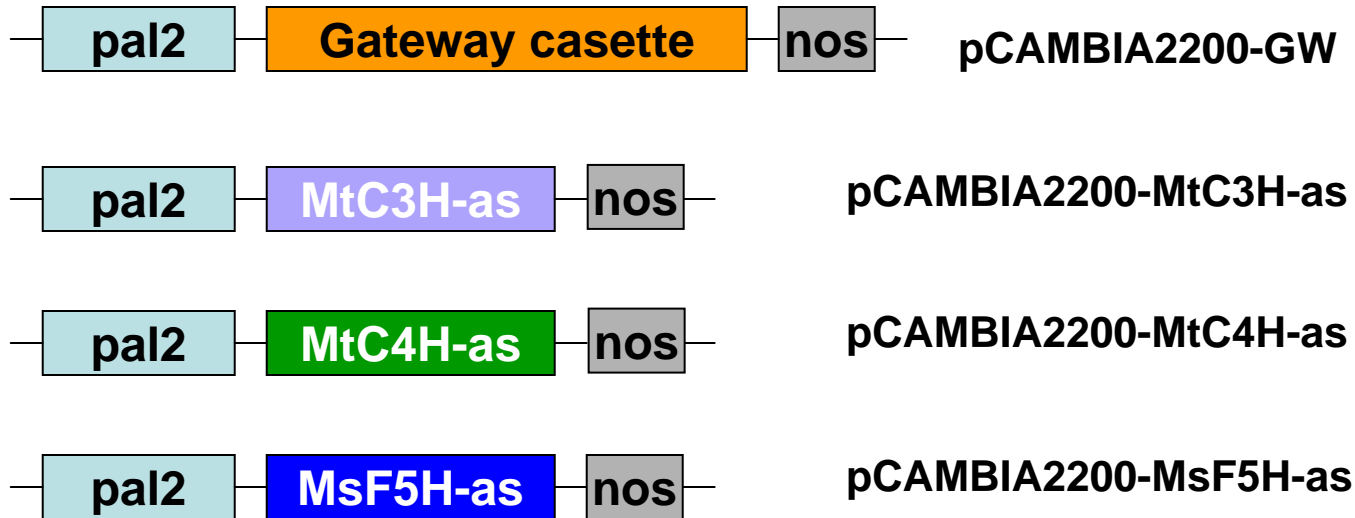

Supplement: pnas_0505749102_1.pdf [file pnas_0505749102_1.pdf]

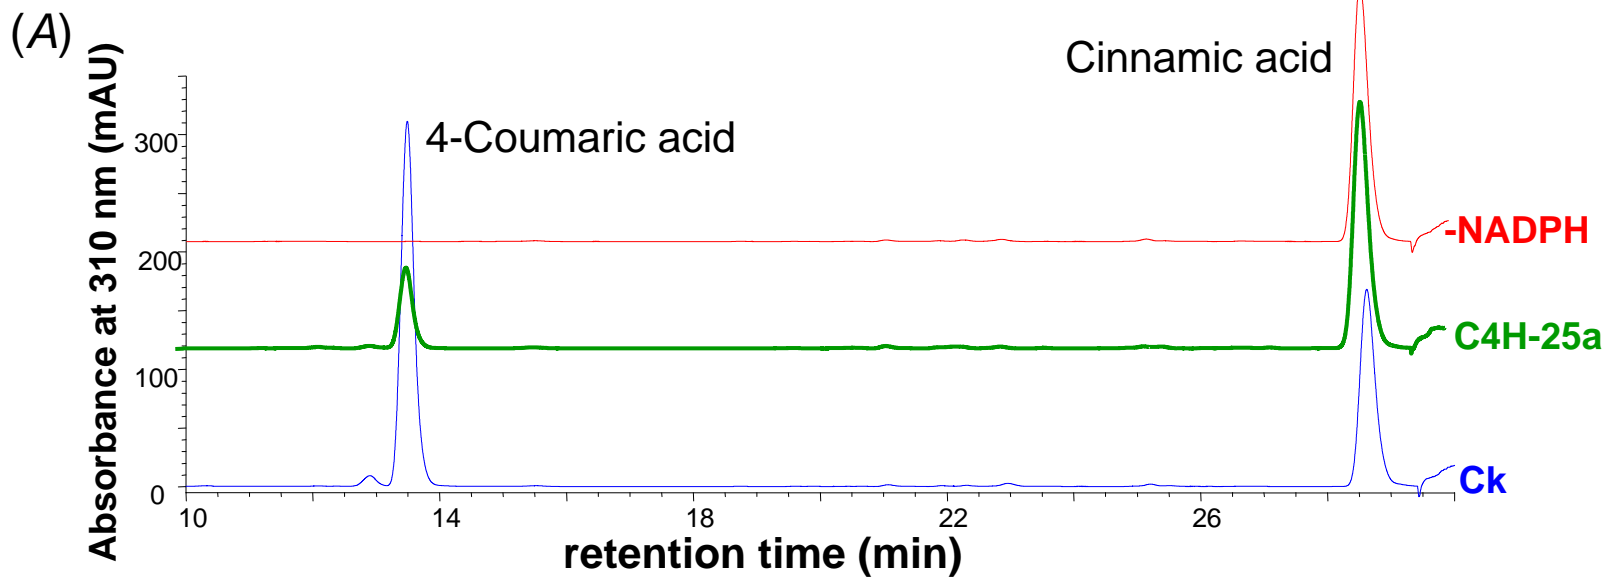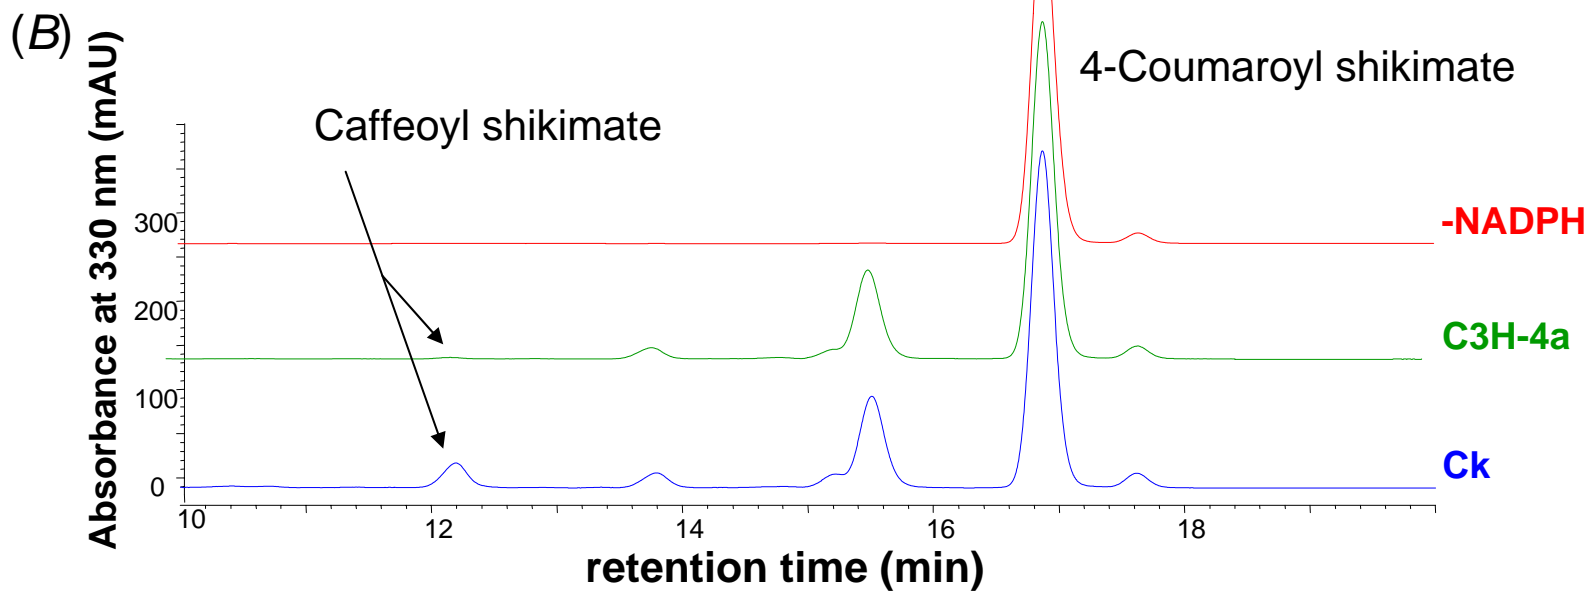

Supplement: pnas_0505749102_2.pdf [file pnas_0505749102_2.pdf]

**(A)**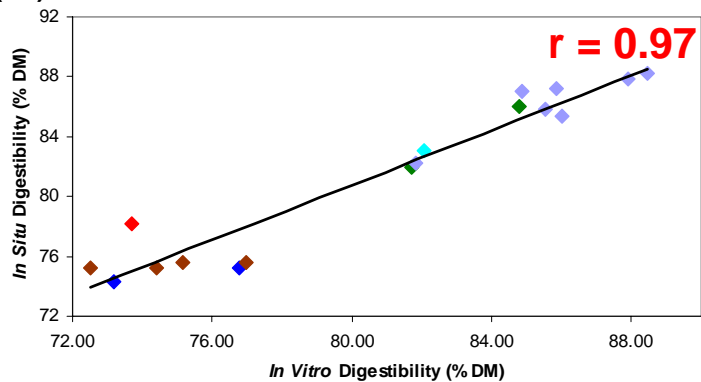**(B)**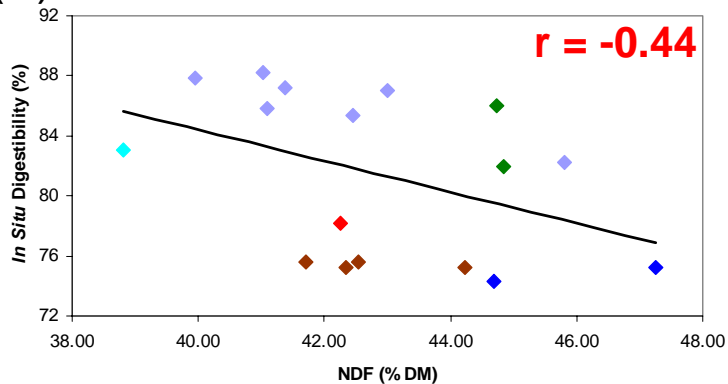**(C)**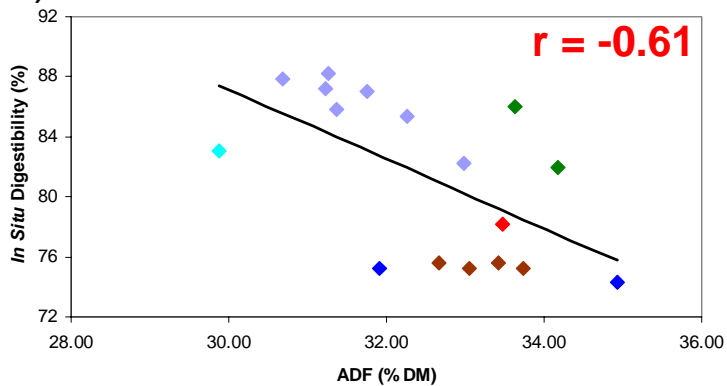**(D)**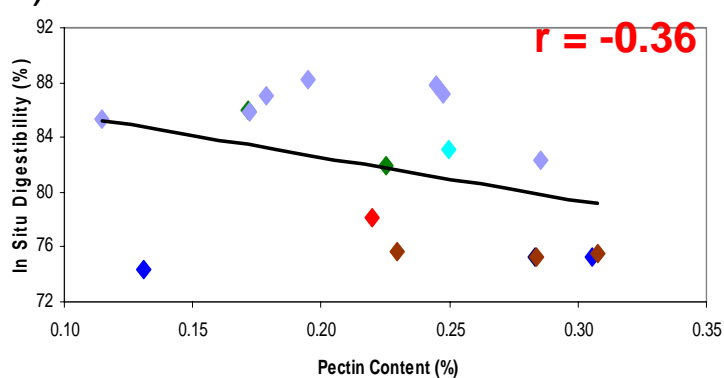

Supplement: pnas_0505749102_3.pdf [file pnas_0505749102_3.pdf]
